# Supplementary material for: Association of Branded Prescription Drug Rebate Size and Patient Out-of-Pocket Costs in a Nationally Representative Sample, 2007-2018
Source: PubMed Central journal article supplement (PMC8204201; doi:10.1001/jamanetworkopen.2021.13393), 2021-06-14
Supplement: jamanetwopen-e2113393-s001.pdf [file jamanetwopen-e2113393-s001.pdf]

## Supplemental Online Content

Yeung K, Dusetzina SB, Basu A. Association of branded prescription drug rebate size and patient out-of-pocket costs in a nationally representative sample, 2007-2018. *JAMA Netw Open*. 2021;4(6):e2113393. doi:10.1001/jamanetworkopen.2021.13393

**eAppendix 1.** Analytic Model Specification

**eAppendix 2.** Generating Estimates Using the Method of Recycled Predictions

**eFigure 1.** Goodness-of-Fit Modified Hosmer-Lemeshow Plots of Mean Residuals by 20 Quantiles Model-Predicted Out-of-Pocket Costs for 3 Model Specifications

**eFigure 2.** Replicating Hernandez et al Price Trends, 2007-2018

**eFigure 3.** Trends in List, Net, Gross, and Federal Supply Schedule Price and Out-of-Pocket Cost Per Prescription, 2007-2018

**eTable 1.** Pearson Correlation of Residual and Predicted Out-of-Pocket Costs for 3 Model Specifications

**eTable 2.** Characteristics of Individuals Included in the Sample by Coverage Type, 2007-2013 and 2014-2018 (Survey-Weighted Values)

**eTable 3.** Number of Unique Drugs and Survey-Weighted Prescriptions by Year

**eTable 4.** Out-of-Pocket Costs, List Price, Net Price, and Estimated Rebates by Drug Class, 2007-2018

**eTable 5.** Regression Coefficients From Primary Analysis, Overall Model, 2007-2013 and 2014-2018

**eTable 6.** Total Out-of-Pocket Costs for Single-Source Branded Prescriptions Per Branded Drug User Per Year

**eTable 7.** Estimated Change in Dependent Variable Given \$1 Increase in Independent Variable, 2007-2013 and 2014-2018

**eTable 8.** Sensitivity Analyses of Estimated Out-Of-Pocket Costs With 2009-2013 Preperiod and Alternative Rebate Definitions

**eTable 9.** Association of Rebates With Probability of Out-of-Pocket Costs and Increase in Out-of-Pocket Costs

### **eReferences**

This supplemental material has been provided by the authors to give readers additional information about their work.

## eAppendix 1. Analytic Model Specification

To generate our overall estimates, we used a linear regression model according to the following specification:

$$E[Y_{icdt} | \cdot] = \beta_0 + \beta_1 \text{rebate}_{idt} + \beta_2 \text{cov\_type}_c + \beta_3 \text{post}_t + \beta_4 \text{year}_t + \beta_5 \text{drug}_d + \beta_6 \text{rebate}_{idt} * \text{cov\_type}_c + \beta_7 \text{rebate}_{idt} * \text{post}_t + \beta_8 \text{cov\_type}_c * \text{post}_t + \beta_9 \text{rebate}_{idt} * \text{cov\_type}_c * \text{post}_t + \alpha X_i$$

Where:

$Y_{icdt}$  = Out-of-pocket costs in 2018 US dollars for prescription fill “i” for drug “d” in year “t”

$\text{Rebate}_{idt}$  = Estimated rebate size in 2018 US dollars for prescription fill “i” for drug “d” in year “t”

$\text{cov\_type}_c$  = Categorical variable for Medicare coverage entire year, commercial coverage entire year or uninsured entire year

$\text{post}_t$  = Indicator variable for 2007-2013 or 2014-2018

$\text{year}_t$  = Categorical variable for each of 11 years

$\text{drug}_d$  = Categorical variable for each of the single-source branded drugs in our sample

To generate our estimates by coverage type, we used the same model specification, except that we excluded the “cov\_type<sub>c</sub>” term and repeated the regressions in each of the 3 subpopulations (Medicare, Commercial, and Uninsured).

## **eAppendix 2.** Generating Estimates Using the Method of Recycled Predictions

Overview: The parameter of interest is the average association between rebates and out-of-pocket costs (reported in “Difference” column in Table 2 of our main manuscript). This parameter is informed by the coefficients representing the rebate term with the coverage type and post interactions. Specifically, these terms are:

$$\beta_1 \text{rebate}_{idt} + \beta_6 \text{rebate}_{idt} * \text{cov\_type}_c + \beta_7 \text{rebate}_{idt} * \text{post}_t + \beta_9 \text{rebate}_{idt} * \text{cov\_type}_c * \text{post}$$

These terms and all regression coefficients are estimated and applied in the following steps:

1. Conduct regression: Using the model specification above and as described in the "Primary and Secondary Analyses" section of the main manuscript text.
2. Generate estimate of out-of-pocket costs with observed rebates (i.e., factual estimate): Using the regression model, we predict the out-of-pocket costs for each observation. Then we take the mean of the predicted out-of-pocket costs for those observations. This adjusted mean estimate is reported in “With Observed Rebates” column in Table 2 of our main manuscript.
3. Generate estimate of out-of-pocket costs if rebates were set to zero (i.e., counterfactual estimate): This estimate is also known as the adjusted mean out-of-pocket estimate if list prices were equal to net prices (i.e., if there were no rebates). To generate this estimate, we use the same procedure as step #2 above, except that after conducting the regression, we first set the values of variables representing the rebate equal to zero for each observation, so those coefficients no longer contribute to the predicted values (i.e., “turning off”  $\beta_1, \beta_6, \beta_7, \beta_9$ ). We then predict out-of-pocket costs for each observation. Then, we take the mean of the predicted out-of-pocket costs for these observations. This adjusted mean estimate is reported in “With Zero Rebates” column in Table 2 of our main manuscript.
4. Generating association between rebates and out-of-pocket costs: The difference between the counterfactual and factual estimates represent the adjusted mean association between rebates and out-of-pocket costs which is reported in the “Difference” column in Table 2 of our main manuscript.

**eFigure 1.** Goodness-of-Fit Modified Hosmer-Lemeshow Plots of Mean Residuals by 20 Quantiles Model-Predicted Out-of-Pocket Costs for 3 Model Specifications

**eFigure 1a.** Plot based on linear regression of raw-scale (i.e., untransformed) out-of-pocket costs.

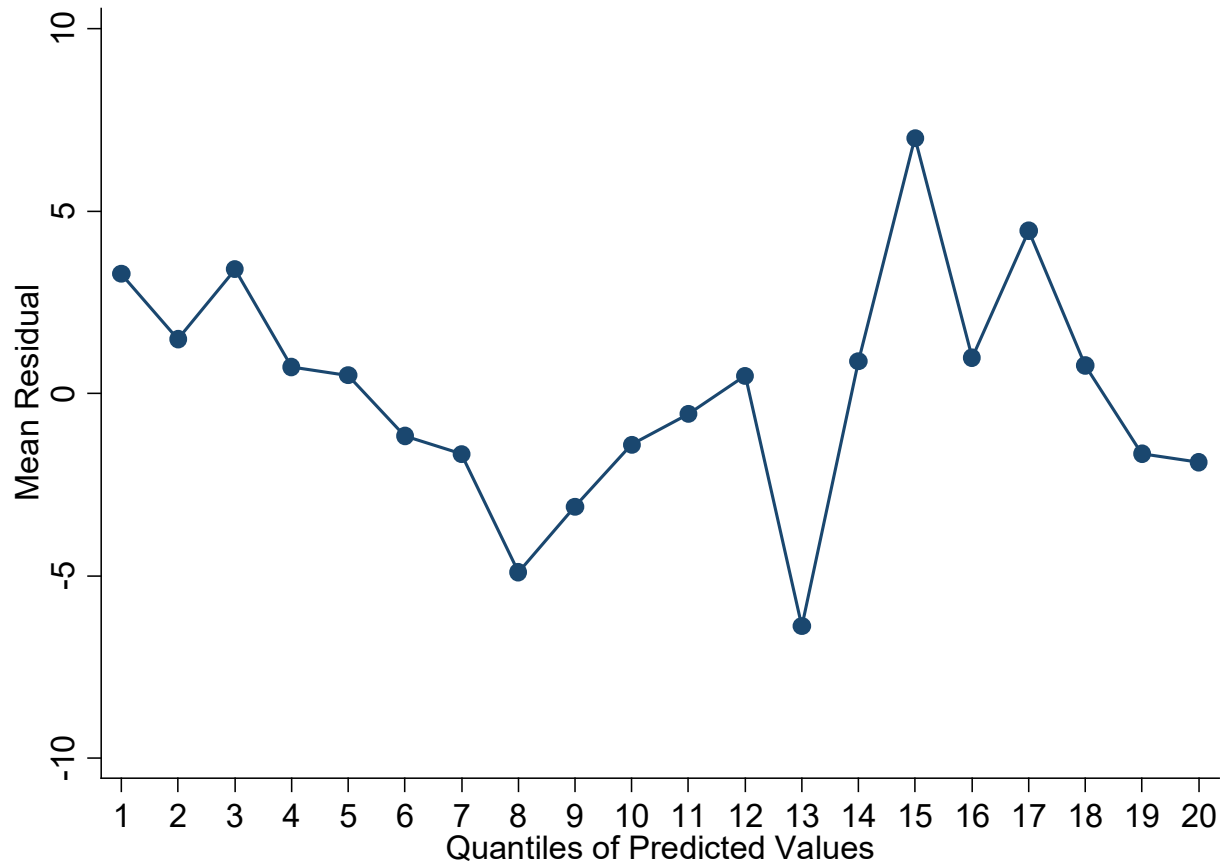

**eFigure 1b.** Plot based on linear regression of logged out-of-pocket costs.

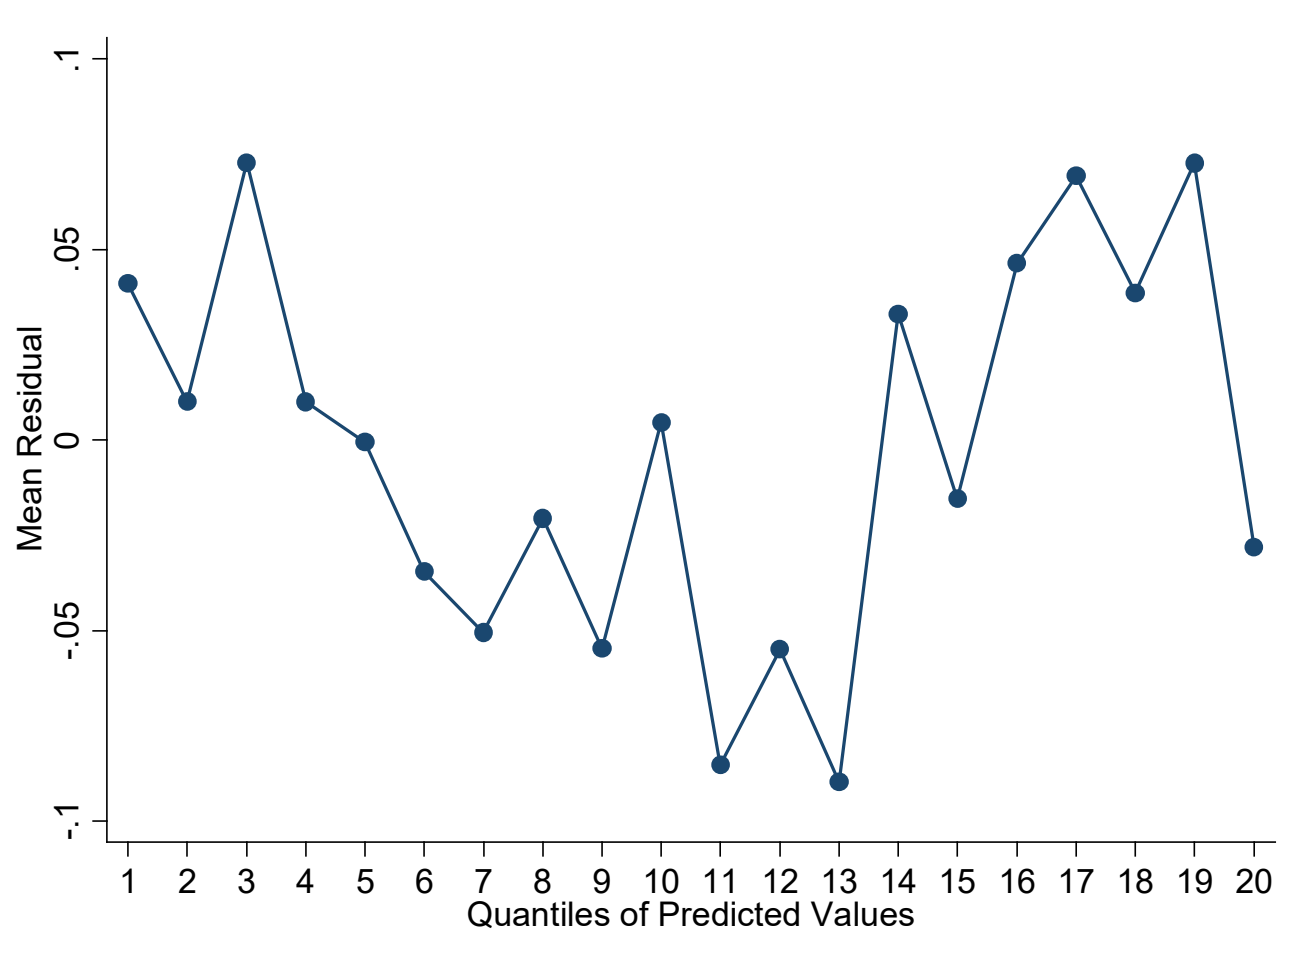

**eFigure 2.** Replicating Hernandez et al Price Trends, 2007-2018

We were able to replicate Hernandez et al.’s list and net trends using the methods they describe. Our trends in Figure 3 agree with that study, with list and net prices increasing over time. However, due to differences in inclusion criteria, our observed trends grew more rapidly. Since our focus was on the association of rebates with out-of-pocket costs, we excluded multi-source branded drugs (i.e., drugs with generic equivalents) because they have low rebates. Further, Hernandez et al. excluded drugs that entered the market after 2007. In addition, our study included only drugs observed in MEPS, which masks the identity of drugs used by fewer than 200,000 people, which typically have smaller rebates.

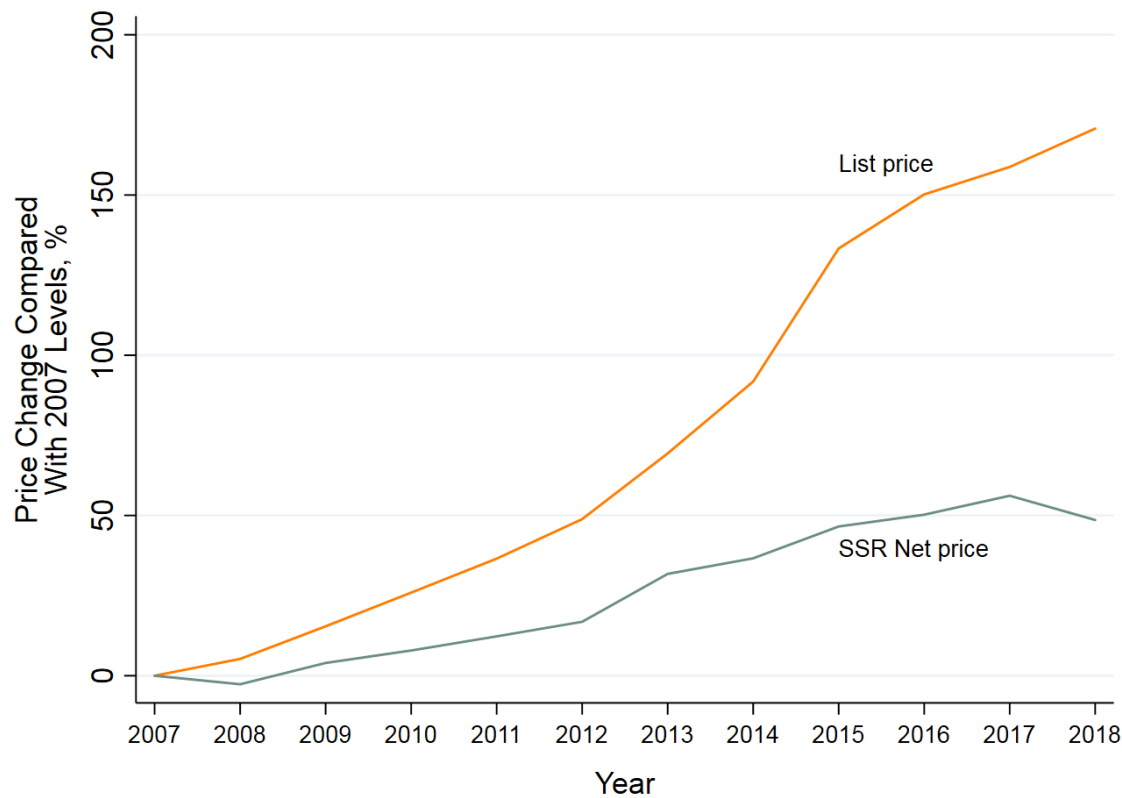

**eFigure 3.** Trends in List, Net, Gross, and Federal Supply Schedule Price and Out-of-Pocket Cost Per Prescription, 2007-2018  
 CAGR, compound annual growth rate.

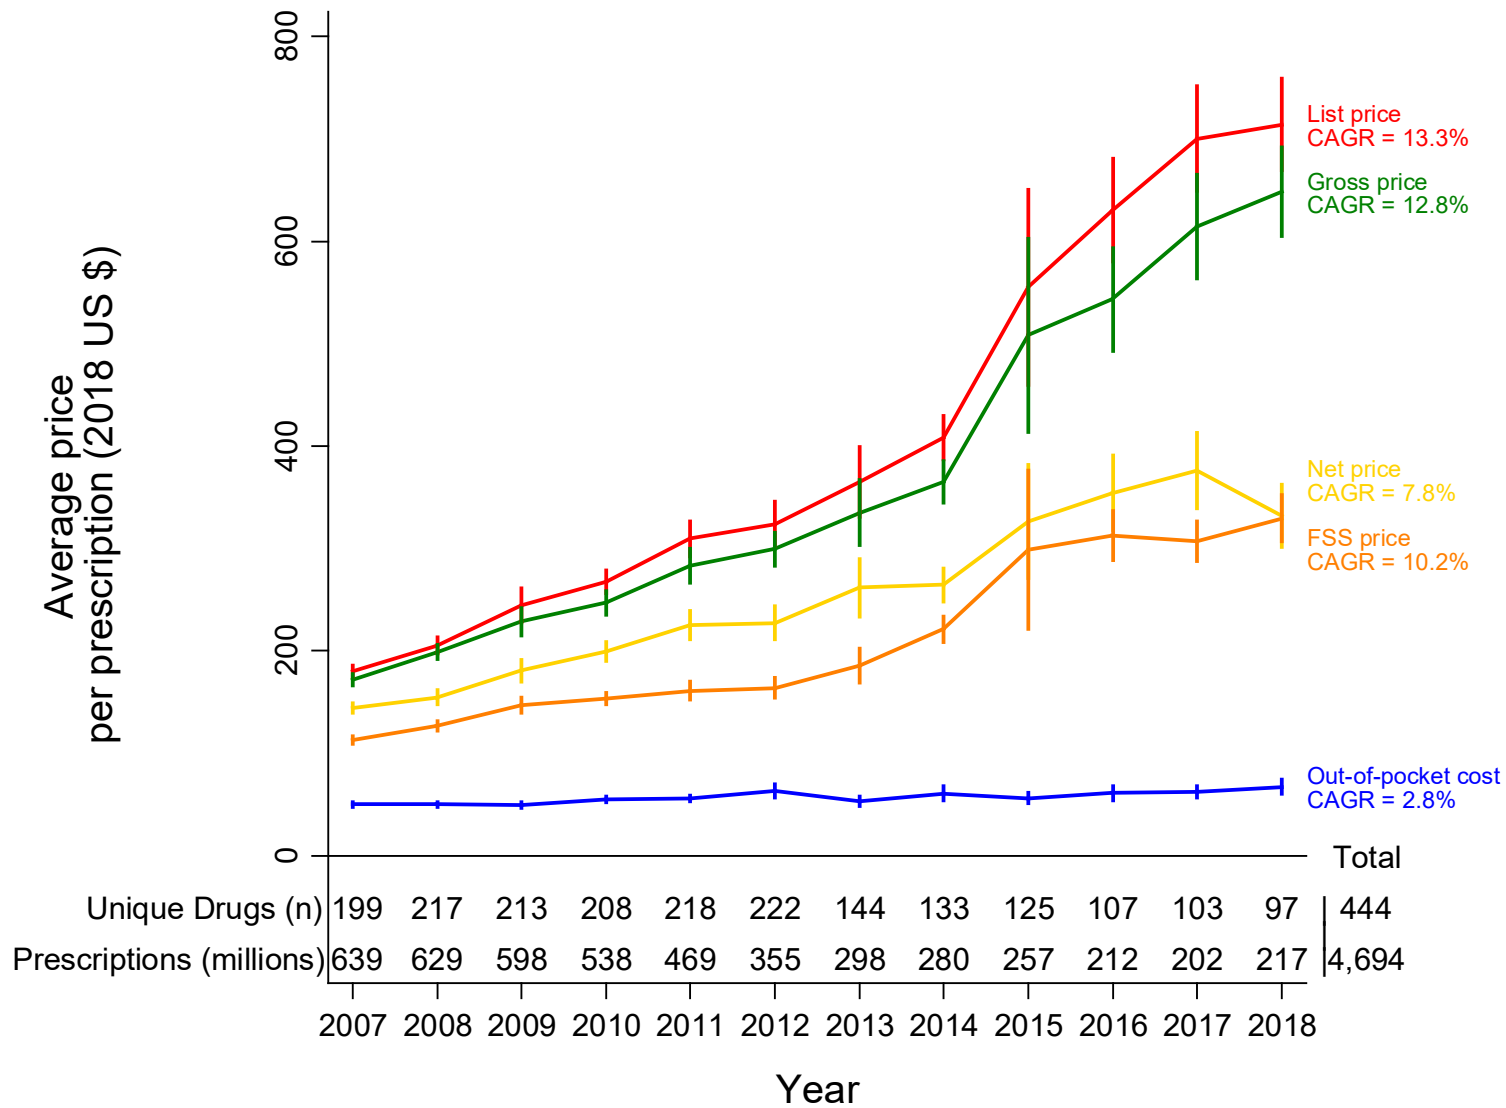

**eTable 1.** Pearson Correlation of Residual and Predicted Out-of-Pocket Costs for 3 Model Specifications

| <b>Model</b>                                                                 | <b>Pearson's correlation</b> |
|------------------------------------------------------------------------------|------------------------------|
| Untransformed estimated rebate and out-of-pocket cost with linear regression | -0.0093                      |
| Logged out-of-pocket and logged estimated rebate with linear regression      | -0.0010                      |



**eTable 2.** Characteristics of Individuals Included in the Sample by Coverage Type, 2007-2013 and 2014-2018 (Survey-Weighted Values)<sup>a</sup>

| Coverage type                                            | Medicare                     |                              | Commercial                   |                              | Uninsured                    |                              |
|----------------------------------------------------------|------------------------------|------------------------------|------------------------------|------------------------------|------------------------------|------------------------------|
|                                                          | 2007-2013                    | 2014-2018                    | 2007-2013                    | 2014-2018                    | 2007-2013                    | 2014-2018                    |
| Years                                                    |                              |                              |                              |                              |                              |                              |
| Survey-weighted person-years in 1000s <sup>b</sup>       | 149,700                      | 82,064                       | 260,369                      | 105,358                      | 25,496                       | 6,276                        |
| Unweighted unique persons <sup>b</sup>                   | 8,897                        | 5,773                        | 15,086                       | 6,645                        | 2,468                        | 672                          |
| <u>Age category</u>                                      |                              |                              |                              |                              |                              |                              |
| ≤18                                                      | 0%                           | 0%                           | 13%                          | 13%                          | 7%                           | 7%                           |
| 19-35                                                    | 0%                           | 0%                           | 15%                          | 18%                          | 20%                          | 17%                          |
| 36-64                                                    | 10%                          | 12%                          | 70%                          | 66%                          | 72%                          | 74%                          |
| ≥65                                                      | 89%                          | 88%                          | 2%                           | 3%                           | 1%                           | 2%                           |
| Female sex                                               | 57%                          | 57%                          | 56%                          | 58%                          | 57%                          | 54%                          |
| <u>Race</u>                                              |                              |                              |                              |                              |                              |                              |
| White only                                               | 87%                          | 85%                          | 86%                          | 84%                          | 81%                          | 76%                          |
| Black only                                               | 8%                           | 9%                           | 8%                           | 9%                           | 12%                          | 14%                          |
| Other                                                    | 4%                           | 6%                           | 6%                           | 8%                           | 6%                           | 9%                           |
| Poor health at sometime within year                      | 15%                          | 16%                          | 5%                           | 5%                           | 18%                          | 16%                          |
| Individual personal income (\$), 95%CI                   | 30528<br>(29214 to<br>31842) | 35893<br>(34481 to<br>37305) | 43502<br>(42442 to<br>44561) | 48291<br>(46685 to<br>49896) | 19351<br>(17537 to<br>21165) | 22628<br>(18902 to<br>26354) |
| Not employed at sometime within year                     | 86%                          | 87%                          | 20%                          | 19%                          | 48%                          | 44%                          |
| 4 years of college education                             | 14%                          | 15%                          | 22%                          | 23%                          | 11%                          | 12%                          |
| Medicare coverage entire year                            | 100%                         | 100%                         | 0%                           | 0%                           | 0%                           | 0%                           |
| Commercial coverage entire year                          | 44%                          | 43%                          | 100%                         | 100%                         | 0%                           | 0%                           |
| Uninsured entire year                                    | 0%                           | 0%                           | 0%                           | 0%                           | 100%                         | 100%                         |
| Total included branded prescriptions filled per year (n) | 10                           | 6.8                          | 7                            | 5.5                          | 6.5                          | 5.4                          |

<sup>a</sup>Reported percentages are survey-weighted values.

<sup>b</sup>There are slightly fewer individuals overall than the sum of individuals by coverage type since a few individuals switched coverage type between survey years.

**eTable 3.** Number of Unique Drugs and Survey-Weighted Prescriptions by Year

| Year                     | 2007 | 2008 | 2009 | 2010 | 2011 | 2012 | 2013 | 2014 | 2015 | 2016 | 2017 | 2018 | Total |
|--------------------------|------|------|------|------|------|------|------|------|------|------|------|------|-------|
| Unique Drugs (n)         | 199  | 217  | 213  | 208  | 218  | 222  | 144  | 133  | 125  | 107  | 103  | 97   | 444   |
| Prescriptions (millions) | 639  | 629  | 598  | 538  | 469  | 355  | 298  | 280  | 257  | 212  | 202  | 217  | 4,694 |

| <b>eTable 4. Out-of-Pocket Costs, List Price, Net Price, and Estimated Rebates by Drug Class, 2007-2018</b> |                                   |                                                  |                            |                   |                  |                          |                                                   |
|-------------------------------------------------------------------------------------------------------------|-----------------------------------|--------------------------------------------------|----------------------------|-------------------|------------------|--------------------------|---------------------------------------------------|
| <b>Drug Class</b>                                                                                           | <b>Number of Unique Drugs (n)</b> | <b>Number of prescriptions (survey weighted)</b> | <b>Out-of-pocket costs</b> | <b>List price</b> | <b>Net Price</b> | <b>Estimated Rebates</b> | <b>Estimated Rebates as percent of list price</b> |
|                                                                                                             |                                   |                                                  | 2018 US dollars            |                   |                  |                          |                                                   |
| ADHD treatments                                                                                             | 8                                 | 81,356,085                                       | 56                         | 249               | 171              | 78                       | 31                                                |
| Acne treatments (Topical)                                                                                   | 3                                 | 2,497,894                                        | 42                         | 440               | 248              | 192                      | 44                                                |
| Alzheimer's disease treatments                                                                              | 5                                 | 27,139,614                                       | 80                         | 389               | 336              | 53                       | 14                                                |
| Anemia treatments (B12 deficiency)                                                                          | 1                                 | 422,612                                          | 27                         | 1099              | 894              | 205                      | 19                                                |
| Anti-Ulcer (Other)                                                                                          | 1                                 | 1,391,766                                        | 48                         | 291               | 272              | 19                       | 7                                                 |
| Anti-Ulcer (PPIs)                                                                                           | 6                                 | 215,648,725                                      | 51                         | 328               | 132              | 196                      | 60                                                |
| Antibacterials                                                                                              | 1                                 | 167,492                                          | 129                        | 527               | 345              | 182                      | 35                                                |
| Anticonvulsants                                                                                             | 11                                | 37,274,236                                       | 64                         | 387               | 316              | 70                       | 18                                                |
| Antiemetics                                                                                                 | 1                                 | 528,420                                          | 87                         | 483               | 435              | 47                       | 10                                                |
| Antifungals                                                                                                 | 2                                 | 308,121                                          | 28                         | 2898              | 2481             | 417                      | 14                                                |
| Antiviral (Other)                                                                                           | 4                                 | 20,910,640                                       | 55                         | 220               | 156              | 64                       | 29                                                |
| Atopic dermatitis                                                                                           | 1                                 | 874,110                                          | 44                         | 195               | 119              | 76                       | 39                                                |
| Atypical antipsychotics                                                                                     | 10                                | 64,324,361                                       | 78                         | 627               | 544              | 83                       | 13                                                |
| Alpha blockers                                                                                              | 2                                 | 23,656,833                                       | 54                         | 200               | 168              | 32                       | 16                                                |
| Benzodiazepines                                                                                             | 2                                 | 2,629,709                                        | 37                         | 180               | 145              | 35                       | 19                                                |
| Bowel preparation                                                                                           | 1                                 | 1,824,359                                        | 40                         | 68                | 43               | 25                       | 37                                                |
| COPD treatments (Bronchodilators)                                                                           | 10                                | 194,011,928                                      | 29                         | 91                | 38               | 53                       | 58                                                |
| COPD treatments (Combos)                                                                                    | 5                                 | 247,956,683                                      | 57                         | 403               | 233              | 170                      | 42                                                |
| COPD treatments (Glucocorticoids)                                                                           | 6                                 | 73,855,481                                       | 51                         | 552               | 372              | 180                      | 33                                                |
| COPD/Asthma treatments (Other)                                                                              | 3                                 | 93,608,822                                       | 49                         | 217               | 173              | 44                       | 20                                                |
| Cardiovascular (ARBs, ARB combos)                                                                           | 6                                 | 249,905,585                                      | 49                         | 149               | 100              | 49                       | 33                                                |
| Cardiovascular (Beta blockers)                                                                              | 3                                 | 107,217,488                                      | 38                         | 124               | 88               | 36                       | 29                                                |
| Cardiovascular (Other)                                                                                      | 2                                 | 13,033,482                                       | 57                         | 420               | 339              | 80                       | 19                                                |
| Chelating agents                                                                                            | 1                                 | 3,038,386                                        | 97                         | 1321              | 878              | 442                      | 33                                                |

|                                        |    |             |     |       |       |       |    |
|----------------------------------------|----|-------------|-----|-------|-------|-------|----|
| Cholesterol (Non-PCSK9)                | 10 | 704,266,418 | 52  | 223   | 147   | 76    | 34 |
| Contraceptives                         | 9  | 86,675,831  | 32  | 116   | 86    | 30    | 26 |
| DMARDs (Anti-TNF)                      | 4  | 36,030,628  | 307 | 3947  | 3104  | 842   | 21 |
| Depression                             | 12 | 215,747,316 | 52  | 211   | 175   | 36    | 17 |
| Diabetes (DPP-4 inhibitors)            | 6  | 110,652,004 | 57  | 494   | 256   | 238   | 48 |
| Diabetes (GLP-1 agonists)              | 5  | 41,971,377  | 75  | 679   | 457   | 222   | 33 |
| Diabetes (Long-acting insulins)        | 5  | 188,272,140 | 59  | 503   | 263   | 240   | 48 |
| Diabetes (Other)                       | 4  | 8,008,472   | 31  | 240   | 150   | 91    | 38 |
| Diabetes (Rapid-acting/mix insulins)   | 5  | 106,157,590 | 64  | 666   | 270   | 396   | 59 |
| Diabetes (SGLT2 inhibitors)            | 3  | 22,181,045  | 74  | 574   | 225   | 349   | 61 |
| Diabetes (Short-acting insulins)       | 2  | 117,439,195 | 45  | 485   | 303   | 182   | 38 |
| Erectile dysfunction (other)           | 1  | 4,742,000   | 54  | 117   | 50    | 66    | 56 |
| Erythropoietin-stimulating agents      | 3  | 2,706,854   | 224 | 1987  | 1128  | 859   | 43 |
| Epinephrine                            | 2  | 6,016,942   | 66  | 352   | 293   | 59    | 17 |
| Erectile dysfunction (PDE5 inhibitors) | 2  | 31,848,176  | 84  | 357   | 234   | 123   | 34 |
| Exocrine pancreatic insufficiency      | 2  | 6,346,323   | 107 | 1345  | 1060  | 284   | 21 |
| Female hormone therapy                 | 2  | 80,296,949  | 50  | 194   | 152   | 42    | 22 |
| Fibrinolytics                          | 2  | 2,640,336   | 147 | 631   | 501   | 130   | 21 |
| Glaucoma treatments                    | 5  | 49,709,883  | 49  | 182   | 103   | 79    | 43 |
| Gonadotropins                          | 3  | 454,213     | 420 | 1639  | 1479  | 160   | 10 |
| Gout treatments                        | 2  | 11,106,979  | 50  | 270   | 196   | 73    | 27 |
| Hepatitis C treatments                 | 3  | 792,021     | 993 | 27668 | 16101 | 11567 | 42 |
| HIV treatments                         | 19 | 17,522,590  | 97  | 1600  | 1161  | 439   | 27 |
| Hypothyroid treatments                 | 2  | 254,814,256 | 26  | 40    | 23    | 17    | 43 |
| Inflammatory bowel disease treatments  | 8  | 21,386,038  | 83  | 733   | 567   | 167   | 23 |
| Irritable bowel syndrome treatments    | 3  | 9,901,896   | 50  | 790   | 546   | 245   | 31 |
| Immunosuppressants                     | 5  | 4,031,515   | 92  | 703   | 588   | 115   | 16 |
| Insomnia treatments                    | 2  | 33,924,718  | 51  | 215   | 151   | 64    | 30 |

|                                            |     |             |     |      |      |      |    |
|--------------------------------------------|-----|-------------|-----|------|------|------|----|
| Multiple sclerosis treatments              | 5   | 6,040,633   | 414 | 2287 | 1628 | 659  | 29 |
| Migraine (Non-triptans)                    | 1   | 236,275     | 64  | 371  | 193  | 178  | 48 |
| Migraine (Triptans)                        | 7   | 27,195,697  | 59  | 269  | 204  | 64   | 24 |
| Nasal glucocorticoids                      | 6   | 70,548,192  | 42  | 140  | 82   | 58   | 41 |
| Overactive bladder treatments              | 3   | 28,444,394  | 47  | 236  | 181  | 55   | 23 |
| Obesity                                    | 2   | 723,096     | 45  | 656  | 487  | 170  | 26 |
| Oncology (Hormonal / GnRH)                 | 1   | 377,669     | 79  | 2610 | 1017 | 1593 | 61 |
| Oncology (Kinase inhibitors)               | 1   | 8,129       | 1   | 7260 | 7017 | 242  | 3  |
| Oncology (Nucleoside metabolic inhibitors) | 1   | 970,053     | 234 | 2127 | 1544 | 583  | 27 |
| Ophthalmic treatments                      | 3   | 15,430,998  | 68  | 800  | 480  | 321  | 40 |
| Opioid dependence                          | 1   | 1,315,142   | 20  | 235  | 135  | 101  | 43 |
| Oral anticoagulants                        | 2   | 55,014,011  | 69  | 540  | 315  | 225  | 42 |
| Osteoporosis                               | 8   | 88,298,275  | 65  | 250  | 182  | 68   | 27 |
| Overactive bladder                         | 3   | 36,546,264  | 61  | 354  | 190  | 164  | 46 |
| Pain (Opioids)                             | 2   | 1,814,395   | 29  | 332  | 192  | 140  | 42 |
| Pain, Inflammation (Non-opioids)           | 8   | 155,816,940 | 54  | 333  | 238  | 95   | 29 |
| Parkinson's disease treatments             | 3   | 6,788,464   | 71  | 404  | 373  | 32   | 8  |
| Platelet aggregation inhibitors            | 3   | 116,757,720 | 53  | 255  | 230  | 26   | 10 |
| Pulmonary arterial hypertension            | 1   | 147,367     | 56  | 2483 | 2428 | 55   | 2  |
| Smoking cessation                          | 1   | 10,695,148  | 73  | 198  | 162  | 36   | 18 |
| Testosterone                               | 5   | 16,100,863  | 66  | 478  | 348  | 130  | 27 |
| Vaccines                                   | 4   | 876,175     | 45  | 135  | 114  | 21   | 16 |
| Other                                      | 147 | 415,035,958 | 49  | 231  | 168  | 63   | 27 |

ADHD: attention deficit hyperactivity disorder, ARB: angiotensin II receptor blocker, Anti-TNF: anti-tumor necrosis factor, COPD: chronic obstructive pulmonary disease, DMARDs: disease-modifying antirheumatic drugs, DPP-4: dipeptidyl peptidase-4, GLP-1: glucagon-like peptide-1, GnRH: gonadotropin-releasing hormone, HIV: human immunodeficiency virus, PCSK9: proprotein convertase subtilisin/kexin type 9, PDE5: phosphodiesterase type 5; PPIs, proton pump inhibitors; SGLT2, sodium-glucose co-transporter-2

**eTable 5.** Regression Coefficients From Primary Analysis, Overall Model, 2007-2013 and 2014-2018

| <b>Regression parameter</b> | <b>Beta Coefficient<br/>(95% CI)</b> |
|-----------------------------|--------------------------------------|
| Rebate                      | 0.08 (0.03 to 0.13)                  |
| Commercial                  | 0.56 (-2.68 to 3.81)                 |
| Uninsured                   | 20.66 (0.93 to 40.39)                |
| Commercial*Rebate           | -0.08 (-0.13 to -0.03)               |
| Uninsured*Rebate            | 0.56 (0.11 to 1.01)                  |
| Post_2014                   | -2.77 (-17.99 to 12.46)              |
| Post_2014*Rebate            | -0.02 (-0.09 to 0.05)                |
| Commercial*Post_2014        | 8.62 (-12.06 to 29.29)               |
| Uninsured*Post_2014         | 24.36 (-14.35 to 63.07)              |
| Commercial*Post_2014*Rebate | 0.02 (-0.07 to 0.12)                 |
| Uninsured*Post_2014*Rebate  | -0.43 (-0.9 to 0.03)                 |
| Abilify                     | 48.21 (12.7 to 83.72)                |
| Acanya                      | -7.08 (-20.04 to 5.88)               |
| Accolate                    | -21.47 (-32.88 to -10.05)            |
| Accuneb                     | -23.03 (-46.03 to -0.04)             |
| Aciphex                     | 1.71 (-6.87 to 10.29)                |
| Actonel                     | 0.4 (-5.8 to 6.6)                    |
| Actos / Actoplus Met        | 6 (-0.16 to 12.15)                   |
| Acular / LS / PF            | -33.81 (-65.04 to -2.58)             |
| Aczone                      | -22.6 (-36.61 to -8.6)               |
| Adderall XR                 | -27.74 (-38.6 to -16.89)             |
| Admelog                     | -62.14 (-88.96 to -35.31)            |
| Advair                      | -2.01 (-6.41 to 2.38)                |
| Akne-Mycin                  | -7.7 (-33.01 to 17.62)               |
| Aldara                      | -48.44 (-51.42 to -45.45)            |
| AlleRx                      | -13.94 (-16.91 to -10.96)            |
| AlleRx DF                   | -35.38 (-38.04 to -32.71)            |
| Allegra / -D                | -17.59 (-22.09 to -13.08)            |
| Alora                       | -8.41 (-17.26 to 0.44)               |
| Alphagan P                  | -11.92 (-24.32 to 0.49)              |
| Alrex                       | 33.36 (-27.23 to 93.96)              |
| Altabax                     | -1.49 (-11.26 to 8.28)               |
| Altace                      | -13.78 (-19.93 to -7.63)             |
| Alvesco                     | -21.58 (-31.94 to -11.21)            |
| Amaryl                      | -32.81 (-41.42 to -24.21)            |
| Ambien / CR                 | -2.75 (-8.59 to 3.1)                 |
| Amitiza                     | -22.87 (-40.62 to -5.11)             |
| Ampyra                      | -57.73 (-65.75 to -49.71)            |
| Amrix                       | -18.16 (-36.83 to 0.51)              |
| Androderm                   | 30.68 (0.04 to 61.33)                |
| Androgel                    | 17.57 (-5.22 to 40.36)               |
| Android                     | -3.28 (-6.18 to -0.38)               |

|                         |                           |
|-------------------------|---------------------------|
| Anoro Ellipta           | -10.44 (-29.39 to 8.51)   |
| Anusol-HC               | -43.74 (-46.64 to -40.85) |
| Apidra                  | 37.29 (15.62 to 58.97)    |
| Aplenzin                | 12.46 (-18.21 to 43.13)   |
| Apriso                  | -9.17 (-19.29 to 0.96)    |
| Aranesp                 | 543.61 (401.02 to 686.21) |
| Aricept                 | 38.82 (14.93 to 62.7)     |
| Arimidex                | 21.14 (-2.33 to 44.62)    |
| Arixtra                 | 29.34 (-11.95 to 70.63)   |
| Armour Thyroid          | -27.79 (-35.33 to -20.26) |
| Arnuity Ellipta         | 29.15 (-27.53 to 85.82)   |
| Aromasin                | -50.41 (-53.98 to -46.84) |
| Arthrotec               | -7.07 (-29.12 to 14.97)   |
| Asacol                  | 15.1 (-7.13 to 37.33)     |
| Asacol HD               | 46.75 (22 to 71.51)       |
| Asmanex                 | -29.13 (-43.99 to -14.28) |
| Atacand / HCT           | 7.59 (-3.32 to 18.5)      |
| Atelvia                 | 11.92 (-14.95 to 38.8)    |
| Ativan                  | -27.36 (-38.9 to -15.82)  |
| Atralin                 | -9.82 (-44.69 to 25.05)   |
| Atripla                 | 42.47 (-70.15 to 155.1)   |
| Augmentin / XR / ES-600 | -18.41 (-22.49 to -14.33) |
| Auvi-Q                  | -35.08 (-61.2 to -8.96)   |
| Avandamet               | 2.64 (-14.66 to 19.94)    |
| Avandaryl               | 10.29 (-6.59 to 27.16)    |
| Avandia                 | 10.41 (-1.77 to 22.59)    |
| Avapro / Avalide        | 0.12 (-5.48 to 5.72)      |
| Avelox                  | 6.06 (-1.91 to 14.03)     |
| Avinza                  | 9.16 (-21.63 to 39.94)    |
| Avodart                 | 4.88 (-2.12 to 11.87)     |
| Avonex                  | 326.41 (0.72 to 652.09)   |
| Axiron                  | -33.74 (-92.38 to 24.89)  |
| Azasan                  | -6.08 (-8.7 to -3.45)     |
| Azilect                 | 11.53 (4.47 to 18.59)     |
| Azor                    | 7.13 (-7.37 to 21.62)     |
| Bactroban               | -23.77 (-33.17 to -14.37) |
| Balacet 325             | 50.51 (47.08 to 53.94)    |
| Baraclude               | 105.45 (-158.21 to 369.1) |
| Basaglar                | -50.5 (-66.5 to -34.49)   |
| Benicar / HCT           | -0.29 (-4.54 to 3.96)     |
| Bentyl                  | -39.11 (-59.06 to -19.16) |
| Benzaclin               | -33.11 (-61.58 to -4.65)  |
| Bepreve                 | -20.72 (-38.19 to -3.25)  |
| Besivance               | 5.62 (-8.12 to 19.36)     |
| Betaseron               | 137.78 (-128.63 to 404.2) |

|                    |                              |
|--------------------|------------------------------|
| Biaxin / XL        | -26.46 (-38.52 to -14.39)    |
| Bicillin           | -36.47 (-44.21 to -28.73)    |
| Boniva             | -0.16 (-9.07 to 8.74)        |
| Boostrix           | -48.43 (-52.76 to -44.11)    |
| Breo Ellipta       | 25.55 (-20.79 to 71.89)      |
| Brevicon           | -23.67 (-34.04 to -13.29)    |
| Brilinta           | 23.55 (-37.83 to 84.93)      |
| Bydureon           | 21.3 (-35 to 77.6)           |
| Byetta             | 29.55 (5.52 to 53.58)        |
| Bystolic           | -2.85 (-8.77 to 3.07)        |
| Caduet             | 16.62 (1.84 to 31.4)         |
| Cambia             | -2.91 (-28.3 to 22.48)       |
| Campral            | 33.31 (-20.42 to 87.04)      |
| Canasa             | 10.43 (-30.16 to 51.03)      |
| Capital w/ Codeine | 0.61 (-18.34 to 19.55)       |
| Carac              | 11.11 (-14.49 to 36.7)       |
| Carafate           | -1.44 (-15.73 to 12.85)      |
| Cardizem           | -36.95 (-49.04 to -24.86)    |
| Cardizem CD        | -8.51 (-37.14 to 20.12)      |
| Cardizem LA        | 14.53 (-12.38 to 41.44)      |
| Casodex            | 77.1 (-42.93 to 197.12)      |
| Celebrex           | 1.93 (-3.1 to 6.96)          |
| Celexa             | -5.63 (-54.98 to 43.72)      |
| Cellcept           | 22.36 (-66.9 to 111.62)      |
| Chantix            | 22.94 (11.13 to 34.75)       |
| Cialis             | 34.89 (17.28 to 52.5)        |
| Cimzia             | 1718.88 (1555.67 to 1882.08) |
| Clarinet / D       | -13.17 (-17.82 to -8.51)     |
| Cleocin            | -18.13 (-62.09 to 25.84)     |
| Cloderm            | -12.06 (-27.94 to 3.81)      |
| Colazal            | 9.1 (2.45 to 15.75)          |
| Colcrys            | -13.77 (-25.83 to -1.71)     |
| Combigan           | -4.14 (-19.71 to 11.42)      |
| Combivir           | -13.73 (-53.65 to 26.2)      |
| Complera           | -292.95 (-540.62 to -45.27)  |
| Concerta           | -0.36 (-9.09 to 8.38)        |
| Condylox           | -18.51 (-29.31 to -7.7)      |
| Copaxone           | 344.26 (148.13 to 540.4)     |
| Cordran Tape       | -27.48 (-39.35 to -15.61)    |
| Coreg / CR         | -13.42 (-19.84 to -7)        |
| Cosopt / Trusopt   | -7.48 (-14.9 to -0.06)       |
| Cotempla XR-ODT    | -42.08 (-49.98 to -34.18)    |
| Cozaar / Hyzaar    | -0.53 (-8 to 6.95)           |
| Creon              | 5.26 (-40.15 to 50.67)       |
| Crestor            | 0.11 (-4.02 to 4.23)         |



|                      |                             |
|----------------------|-----------------------------|
| Crinone              | 7.62 (-39.29 to 54.52)      |
| Cymbalta             | 3.02 (-3.07 to 9.12)        |
| Cytomel              | -7.86 (-25.23 to 9.51)      |
| Daliresp             | 34.38 (-73.18 to 141.94)    |
| Delatestryl          | -4.39 (-19.44 to 10.66)     |
| Delzicol             | 15.33 (-26.83 to 57.5)      |
| Depakote             | -17.15 (-26.85 to -7.46)    |
| Descovy              | 40.06 (-114.08 to 194.19)   |
| Detrol / LA          | -5.01 (-11.01 to 0.98)      |
| Dexilant             | -7.33 (-16 to 1.34)         |
| Dexpak               | 9.31 (-21.92 to 40.54)      |
| Diastat / Acudial    | 158.69 (3.72 to 313.66)     |
| Diflucan             | -42.45 (-46.48 to -38.43)   |
| Diovan / HCT         | -3.72 (-6.96 to -0.48)      |
| Diuril               | -45.61 (-48.82 to -42.4)    |
| Doryx                | -16.34 (-32.06 to -0.62)    |
| Dovonex              | -16.43 (-29.4 to -3.45)     |
| Duac / CS            | -13.8 (-30.64 to 3.05)      |
| Duexis               | 370.12 (-218.74 to 958.98)  |
| Dulera               | 0.12 (-9.13 to 9.37)        |
| Edecrin              | -195.26 (-305.84 to -84.67) |
| Effexor / XR         | -4.88 (-12.12 to 2.37)      |
| Effient              | 9.11 (-6.81 to 25.02)       |
| Efudex               | 36.3 (-25.01 to 97.61)      |
| Elidel               | -10.45 (-51.21 to 30.32)    |
| Eliquis              | 19.3 (2.53 to 36.06)        |
| Embeda               | -54.89 (-58.15 to -51.62)   |
| Emend                | 37.54 (-27.53 to 102.6)     |
| Emtriva              | 4.38 (-0.48 to 9.25)        |
| Enablex              | -0.8 (-11.74 to 10.14)      |
| Enbrel               | 141.76 (42.61 to 240.92)    |
| Engerix-B            | -9.22 (-12.7 to -5.73)      |
| Entresto             | 48.36 (-68.21 to 164.93)    |
| EpiPen               | 15.63 (0.74 to 30.51)       |
| Epivir               | 92.79 (-46.09 to 231.67)    |
| Epivir HBV           | 49.25 (12.71 to 85.79)      |
| Epogen               | -6.55 (-63.63 to 50.53)     |
| Epzicom              | -116.01 (-274.1 to 42.09)   |
| Ertaczo              | 124.08 (86.79 to 161.36)    |
| Estrace cream        | 11.56 (0.61 to 22.5)        |
| Estrostep Fe / Tilia | -13.17 (-24.46 to -1.87)    |
| Evista               | 19.07 (10.21 to 27.94)      |
| Exalgo               | -61.55 (-72.4 to -50.71)    |
| Exelon               | 80.81 (0.42 to 161.2)       |
| Exforge / HCT        | -3.81 (-11.79 to 4.17)      |

|                          |                              |
|--------------------------|------------------------------|
| FML / Forte / S / S.O.P. | -51.5 (-62.28 to -40.72)     |
| Factive                  | 64.98 (-45.11 to 175.07)     |
| Famvir                   | -14.03 (-26.43 to -1.63)     |
| Farxiga / Xigduo         | -15.17 (-41.33 to 10.98)     |
| Fazaclo                  | -23.43 (-66.62 to 19.76)     |
| Femara                   | 20.39 (-2.24 to 43.01)       |
| Femcon Fe                | -1.17 (-17.87 to 15.54)      |
| Femhrt                   | 10.11 (-4.06 to 24.28)       |
| Femring                  | 52.02 (6.97 to 97.07)        |
| Femtrace                 | 1.88 (-1.52 to 5.29)         |
| Fenoglide                | -38.43 (-43.25 to -33.61)    |
| Fentora                  | 615.69 (458.92 to 772.45)    |
| Fiasp                    | -32.18 (-55.46 to -8.9)      |
| Flector                  | 29.12 (8.92 to 49.32)        |
| Flovent                  | -0.9 (-8.16 to 6.37)         |
| Fluarix / FluLaval       | -43.19 (-54.95 to -31.42)    |
| Fluzone                  | -45.05 (-54.88 to -35.22)    |
| Follistim AQ             | 176.11 (-63.77 to 415.99)    |
| Foradil                  | -50.21 (-75.21 to -25.22)    |
| Forteo                   | 345.12 (187.29 to 502.95)    |
| Fortesta                 | -28.57 (-36.67 to -20.46)    |
| Fosamax / Plus D         | -4.54 (-10.64 to 1.55)       |
| Fragmin                  | 230.65 (53.68 to 407.61)     |
| Frova                    | 0.96 (-28.13 to 30.04)       |
| Fuzeon                   | -47.4 (-50.82 to -43.98)     |
| Gabitril                 | -49.93 (-52.78 to -47.08)    |
| Gelnique                 | -5.27 (-17.93 to 7.39)       |
| Generess Fe              | -29.08 (-41.82 to -16.33)    |
| Geodon                   | -11.49 (-25.93 to 2.95)      |
| Glucagon                 | -20.61 (-26.71 to -14.51)    |
| Glumetza                 | -11.91 (-45.05 to 21.22)     |
| Gonal-F                  | 552.37 (-53.37 to 1158.1)    |
| Gralise                  | -11.58 (-25.85 to 2.7)       |
| Harvoni                  | 157.99 (-1192.91 to 1508.88) |
| Hepsera                  | 24.21 (21.62 to 26.8)        |
| Humalog / Mix            | -6.43 (-15.59 to 2.73)       |
| Humira                   | 234.8 (145.94 to 323.66)     |
| Humulin / Mix            | -18.06 (-23.15 to -12.97)    |
| Hycodan                  | -32.44 (-37.9 to -26.98)     |
| Hylatopic / Plus         | -22.19 (-29.14 to -15.24)    |
| Hyomax                   | -14.45 (-41.37 to 12.47)     |
| Imitrex                  | 35.12 (4.99 to 65.25)        |
| Implanon / Nexplanon     | -45.18 (-48.19 to -42.17)    |
| Incivek                  | 9512.2 (9290.98 to 9733.42)  |
| Incruse Ellipta          | -30.93 (-54.99 to -6.87)     |

|                          |                             |
|--------------------------|-----------------------------|
| Infed                    | -128.63 (-162.64 to -94.62) |
| Intal                    | -45.76 (-52.27 to -39.25)   |
| Intelence                | -33.46 (-44.7 to -22.21)    |
| Intuniv                  | -20.18 (-35.53 to -4.82)    |
| Invega                   | 12.68 (-38.96 to 64.31)     |
| Invega Sustenna / Trinza | -32.79 (-39 to -26.57)      |
| Invokana / Invokamet     | 35.21 (1.03 to 69.4)        |
| Isentress                | 80.85 (-22.23 to 183.93)    |
| Istalol                  | 34.95 (-19.21 to 89.12)     |
| Janumet / XR             | 3.47 (-9.59 to 16.52)       |
| Januvia                  | -4.99 (-11.54 to 1.57)      |
| Jardiance                | -12.52 (-36.1 to 11.07)     |
| Jentadueto               | 24.7 (19.06 to 30.33)       |
| Kadian                   | -34.78 (-57.26 to -12.29)   |
| Kaletra                  | -6.08 (-22.45 to 10.29)     |
| Keppra / XR              | -0.27 (-25.69 to 25.14)     |
| Kombiglyze               | -0.45 (-64.78 to 63.88)     |
| Kytril                   | 138.8 (103.74 to 173.87)    |
| Lamictal / XR            | 16.44 (-4.29 to 37.16)      |
| Lamisil                  | -20.99 (-54.86 to 12.88)    |
| Lantus                   | 4.71 (-2.43 to 11.85)       |
| Latuda                   | 6.03 (-38.9 to 50.97)       |
| Lescol / XL              | -8.34 (-16.83 to 0.14)      |
| Levaquin / Floxin        | -4.28 (-8.74 to 0.19)       |
| Levemir                  | -17.11 (-25.8 to -8.41)     |
| Levitra                  | 1.29 (-10.06 to 12.65)      |
| Levoxyl                  | -36.72 (-39.61 to -33.84)   |
| Lexapro                  | 1.29 (-2.69 to 5.27)        |
| Lexiva                   | -59.44 (-66.5 to -52.39)    |
| Lialda                   | 33.9 (-12.25 to 80.05)      |
| Librax                   | -30.35 (-45.98 to -14.72)   |
| Lidoderm                 | 0.26 (-12.09 to 12.61)      |
| Linzess                  | -19.35 (-35.2 to -3.51)     |
| Lo Loestrin Fe           | -39.12 (-47.59 to -30.66)   |
| Locoid / Lipocream       | -5.33 (-29.66 to 19)        |
| Lodosyn                  | 17.83 (0.16 to 35.49)       |
| Loestrin 24 Fe           | -8.61 (-13.84 to -3.38)     |
| Lotemax                  | -11.92 (-20.29 to -3.54)    |
| Lovaza                   | -9.15 (-14.29 to -4)        |
| Lovenox                  | 82.44 (27.17 to 137.71)     |
| Lumigan                  | 4.88 (-9.15 to 18.91)       |
| Lunesta                  | 1.32 (-14.45 to 17.08)      |
| Lupron                   | -29.77 (-125.3 to 65.75)    |
| Luvox CR                 | 14.57 (8.23 to 20.91)       |
| Lyrica                   | -0.67 (-7.87 to 6.52)       |

|                           |                            |
|---------------------------|----------------------------|
| Maxalt                    | -0.59 (-11.56 to 10.37)    |
| Mestinon                  | -20.55 (-23.21 to -17.88)  |
| Minastrin 24 Fe           | -39.86 (-49.42 to -30.3)   |
| Moban                     | -41.83 (-45.29 to -38.37)  |
| Moviprep                  | -9.5 (-16.4 to -2.6)       |
| Multaq                    | 68.23 (19.82 to 116.63)    |
| Mydayis                   | -42.64 (-54.94 to -30.34)  |
| Myfortic                  | 43.59 (2.94 to 84.25)      |
| Myrbetriq                 | 16.04 (-1.69 to 33.76)     |
| Namenda                   | 3.85 (-7.85 to 15.54)      |
| Namenda XR                | 57.42 (29.28 to 85.56)     |
| Nasacort                  | -1.48 (-9.71 to 6.76)      |
| Nascobal                  | -29.54 (-66.59 to 7.51)    |
| Nasonex                   | -11.71 (-15.8 to -7.62)    |
| Nephro-Vite Rx            | -15.42 (-28.01 to -2.84)   |
| Nephrocaps                | -36.92 (-46.27 to -27.56)  |
| Nexium                    | -12.28 (-19.25 to -5.31)   |
| Niaspan                   | -11.61 (-17.16 to -6.06)   |
| Norvir                    | -21.95 (-58.54 to 14.65)   |
| Novolin                   | -24.93 (-33.59 to -16.28)  |
| Novolog / Mix             | 0.58 (-13.82 to 14.97)     |
| Noxafil                   | -110.1 (-152.66 to -67.55) |
| Nucynta / ER              | -22.96 (-60.78 to 14.87)   |
| Nuvaring                  | -22.94 (-28.63 to -17.26)  |
| Nuvigil                   | 4.24 (-17.24 to 25.71)     |
| Omnaris                   | 3.23 (-9.09 to 15.55)      |
| Onexton                   | -24.84 (-38.03 to -11.64)  |
| Onglyza                   | 0.79 (-23.97 to 25.55)     |
| Opana                     | -43.3 (-46.89 to -39.72)   |
| Opana ER                  | -19.84 (-53.56 to 13.87)   |
| Osmoprep                  | 2.75 (-16.89 to 22.39)     |
| Ovidrel                   | 27.2 (3.79 to 50.61)       |
| Oxsoralen / -Ultra        | 168.54 (149.17 to 187.92)  |
| Oxtellar XR               | 61.48 (36.11 to 86.85)     |
| Oxytrol                   | -20.93 (-36.41 to -5.44)   |
| Ozempic                   | -25.9 (-70.57 to 18.78)    |
| Pataday / Patanol / Pazeo | -7.14 (-20.1 to 5.82)      |
| Paxil / CR                | 32.81 (-24.29 to 89.91)    |
| Pennsaid 2%               | 10.82 (-114.68 to 136.32)  |
| Pentasa                   | 60.36 (-18.69 to 139.42)   |
| Pepcid suspension         | -41.51 (-45.33 to -37.69)  |
| Plavix                    | 2.96 (-2.21 to 8.12)       |
| Plendil / Lexxel          | -46.06 (-61.35 to -30.77)  |
| Pred Forte / G / Mild     | 8.32 (-12.27 to 28.91)     |
| Premarin family           | -1.35 (-5.78 to 3.08)      |

|                         |                            |
|-------------------------|----------------------------|
| Preque 10               | -1.31 (-7.96 to 5.35)      |
| Prevacid                | -2.51 (-11.23 to 6.21)     |
| Prezista / Prezcobix    | -12.17 (-48.82 to 24.48)   |
| Pristiq                 | -1.14 (-9.66 to 7.38)      |
| ProAir                  | -24.47 (-28.38 to -20.56)  |
| Procrit                 | -51.77 (-91.87 to -11.67)  |
| Prograf                 | 10.09 (-27.38 to 47.57)    |
| Prolensa                | 14.08 (-10.92 to 39.08)    |
| Prolia                  | 64.27 (-15.56 to 144.11)   |
| Propecia                | 119.77 (94.7 to 144.84)    |
| Protonix                | -7.32 (-21 to 6.36)        |
| Protopic                | 4.5 (-17.08 to 26.08)      |
| Proventil               | -19.83 (-23.72 to -15.94)  |
| Provigil                | 13.6 (-4.11 to 31.31)      |
| Pulmicort               | 5.56 (-12.83 to 23.94)     |
| Pylera                  | 25.82 (-16.14 to 67.77)    |
| Qvar                    | -9.2 (-20.03 to 1.62)      |
| Ranexa                  | -3.96 (-19.71 to 11.8)     |
| Rapaflo                 | 9.33 (-7.97 to 26.63)      |
| Rapamune                | 41.48 (21.81 to 61.15)     |
| Razadyne / ER / Reminyl | -5.71 (-40.4 to 28.99)     |
| Rebif                   | 728.51 (301.48 to 1155.53) |
| Reclast                 | -26.04 (-49.96 to -2.11)   |
| Rectiv                  | -19.87 (-35.54 to -4.2)    |
| Relenza                 | 1.14 (-10.81 to 13.09)     |
| Relpax                  | 2.78 (-11.23 to 16.79)     |
| Remicade                | 528.76 (518.18 to 539.35)  |
| Renagel / Renvela       | 19.81 (-33.37 to 72.98)    |
| Requip / XL             | -11.36 (-18.82 to -3.91)   |
| Restasis                | 12.36 (-14.96 to 39.67)    |
| Retin-A Micro           | 15.98 (-30.96 to 62.92)    |
| Revatio                 | 3.27 (-66.09 to 72.63)     |
| Reyataz / Evotaz        | -15.44 (-117 to 86.12)     |
| Rhinocort               | -9.53 (-15.46 to -3.6)     |
| Risperdal               | 17.43 (-15.5 to 50.35)     |
| Ritalin / Focalin       | -1.74 (-13.13 to 9.64)     |
| Saphris                 | -20.71 (-47.66 to 6.24)    |
| Sarafem                 | -13.79 (-19.51 to -8.07)   |
| Savella                 | 1.76 (-33.52 to 37.03)     |
| Saxenda                 | -23.34 (-48.62 to 1.93)    |
| Semprex-D               | -30.51 (-37.67 to -23.34)  |
| Serevent                | -2.85 (-18.58 to 12.89)    |
| Seroquel IR             | -4.48 (-14.35 to 5.4)      |
| Seroquel XR             | 46.49 (-18.19 to 111.17)   |
| Shingrix                | -23.19 (-47.14 to 0.76)    |

|                                        |                           |
|----------------------------------------|---------------------------|
| Singular                               | -1.49 (-5.65 to 2.67)     |
| Skelaxin                               | 3.77 (-8.64 to 16.18)     |
| Solodyn                                | 63.43 (-13.37 to 140.22)  |
| Sonata                                 | -26.8 (-51.3 to -2.29)    |
| Soriatane                              | 26.43 (-1.78 to 54.65)    |
| Spectracef                             | -38.99 (-44.68 to -33.31) |
| Sprycel                                | -69.85 (-77.94 to -61.75) |
| Stalevo / Comtan                       | 61.03 (21.52 to 100.54)   |
| Strattera                              | 15.37 (-5.23 to 35.96)    |
| Stribild                               | -52.49 (-58.91 to -46.06) |
| Suboxone Film                          | -33.83 (-47.63 to -20.03) |
| Sumavel Dosepro                        | 25.46 (-11.18 to 62.09)   |
| Sustiva                                | 10.88 (-18.4 to 40.15)    |
| Symbicort                              | -2.21 (-9.07 to 4.65)     |
| Symbyax                                | -36.71 (-50.63 to -22.8)  |
| Symlin                                 | 30.54 (-9.08 to 70.16)    |
| Synalar                                | -48.91 (-51.56 to -46.27) |
| Synthroid                              | -23.55 (-26.92 to -20.18) |
| Taclonex                               | 9.3 (-9.11 to 27.71)      |
| Tamiflu                                | 3.25 (-1.71 to 8.21)      |
| Taytulla                               | -34.66 (-44.3 to -25.02)  |
| Tegretol / XR                          | 16.3 (-13.6 to 46.19)     |
| Tekturna / HCT / Tekamlo /<br>Valturna | -5.27 (-14.17 to 3.63)    |
| Testim                                 | -4.6 (-17.45 to 8.25)     |
| Theo-24                                | 113.13 (106.44 to 119.81) |
| Timoptic / XE                          | -13.28 (-48.43 to 21.87)  |
| Topamax                                | 7.4 (-7.23 to 22.03)      |
| Toprol-XL                              | -21.33 (-24.51 to -18.14) |
| Toujeo                                 | -27.23 (-45.67 to -8.79)  |
| Toviaz                                 | 60.36 (0.79 to 119.94)    |
| Tradjenta                              | -16.27 (-28.09 to -4.45)  |
| Travatan / Z                           | -0.25 (-11.13 to 10.64)   |
| Tresiba                                | -32.32 (-51.83 to -12.82) |
| Tretin-X                               | 70.98 (-24.45 to 166.41)  |
| Treximet                               | 17.22 (-7.24 to 41.68)    |
| Tribenzor                              | -23.44 (-30.71 to -16.16) |
| Tricor / Trilipix                      | -4.6 (-9.89 to 0.69)      |
| Trileptal                              | 2.89 (-42.36 to 48.14)    |
| Trintellix                             | 0.65 (-22.34 to 23.64)    |
| Trokendi XR                            | 160.04 (-49.95 to 370.02) |
| Trulicity                              | 0.3 (-41.73 to 42.33)     |
| Truvada                                | 18.06 (-29.63 to 65.75)   |
| Tudorza                                | -10.81 (-31.08 to 9.45)   |
| Uceris                                 | 454.08 (120.24 to 787.93) |

|                                |                            |
|--------------------------------|----------------------------|
| Uloric                         | 9.35 (-4.27 to 22.97)      |
| Ultram ER                      | 24.28 (-37.14 to 85.7)     |
| Uroxatral                      | 7.8 (-4.45 to 20.06)       |
| Valcyte                        | 43.29 (-94.55 to 181.12)   |
| Valtrex                        | -1.23 (-17.53 to 15.07)    |
| Vanos                          | 27.84 (-1.68 to 57.35)     |
| Vascepa                        | -19.22 (-30.86 to -7.58)   |
| Ventolin                       | -25.17 (-29.54 to -20.79)  |
| Veramyst                       | -16.75 (-21.96 to -11.54)  |
| Vesicare                       | -3.01 (-10.44 to 4.43)     |
| Vfend                          | -17.41 (-21.73 to -13.09)  |
| Viagra                         | 24.75 (12.49 to 37.01)     |
| Victoza                        | 13.94 (0.48 to 27.41)      |
| Victrelis                      | -21.25 (-84.72 to 42.21)   |
| Viibryd                        | 19.1 (0.32 to 37.89)       |
| Vimovo                         | -38.96 (-67.56 to -10.36)  |
| Vimpat                         | 51.68 (-26.36 to 129.72)   |
| Viread                         | -6.36 (-37.97 to 25.26)    |
| Voltaren gel                   | -18.66 (-24.46 to -12.86)  |
| Vytorin                        | 2.74 (-1.76 to 7.25)       |
| Vyvanse                        | 18.36 (4.45 to 32.27)      |
| Welchol                        | 0.74 (-12.06 to 13.53)     |
| Xalatan                        | -2.71 (-9.09 to 3.67)      |
| Xarelto                        | 1.72 (-12.36 to 15.8)      |
| Xeloda                         | 166.25 (-152.85 to 485.35) |
| Xenical                        | 2.19 (-9.97 to 14.34)      |
| Xifaxan                        | 34.91 (-17.26 to 87.08)    |
| Xiidra                         | 33.99 (-14.8 to 82.79)     |
| Xolair                         | 91.1 (-30.25 to 212.45)    |
| Xopenex HFA                    | -21.2 (-29.03 to -13.38)   |
| Xopenex solution               | 43.14 (-37.32 to 123.6)    |
| Xtampza ER                     | -28.48 (-44.77 to -12.19)  |
| Yaz / Yasmin / Safyral / Beyaz | -11.18 (-14.8 to -7.55)    |
| Zanaflex                       | -2.41 (-24.06 to 19.23)    |
| Zegerid                        | 4 (-3.21 to 11.22)         |
| Zelapar                        | -36.45 (-39.67 to -33.24)  |
| Zemplar                        | -29.52 (-44.37 to -14.67)  |
| Zenpep                         | 232.59 (-58.38 to 523.57)  |
| Zetia                          | 1.39 (-3.17 to 5.95)       |
| Zetonna                        | 84.37 (5.7 to 163.03)      |
| Ziagen                         | 19.95 (-15.3 to 55.2)      |
| Ziana                          | -16.17 (-44.06 to 11.71)   |
| Zipsor                         | -28.83 (-50.84 to -6.82)   |
| Zirgan                         | -8.62 (-15.86 to -1.38)    |
| Zoladex                        | 276.74 (181.89 to 371.6)   |

|                 |                          |
|-----------------|--------------------------|
| Zomig           | 1.19 (-24.19 to 26.58)   |
| Zostavax        | 9.94 (-14 to 33.87)      |
| Zovirax topical | -12.81 (-22.46 to -3.17) |
| Zyclara         | 59.96 (-85.9 to 205.83)  |
| Zyflo / CR      | 110.16 (95.95 to 124.37) |
| Zylet           | 22.62 (-12.3 to 57.54)   |
| Zyprexa         | 26.41 (-4.45 to 57.27)   |
| Zyrtec          | -5.17 (-10.57 to 0.23)   |
| 2008            | -1.44 (-4.3 to 1.42)     |
| 2009            | -3.48 (-6.1 to -0.85)    |
| 2010            | 0.23 (-2.85 to 3.31)     |
| 2011            | -0.09 (-3.48 to 3.3)     |
| 2012            | 4.13 (-2.17 to 10.43)    |
| 2013            | -2.01 (-7.8 to 3.78)     |
| 2014            | 3.24 (-5.26 to 11.75)    |
| 2015            | -4.35 (-12.09 to 3.38)   |
| 2016            | -2.08 (-11.88 to 7.72)   |
| 2017            | -1.79 (-9.65 to 6.07)    |
| constant        | 47.64 (44.04 to 51.24)   |

\* signifies coefficient for interaction term (e.g. Commercial\*Rebate = Commercial times Rebate)  
CI, confidence interval



**eTable 6.** Total Out-of-Pocket Costs for Single-Source Branded Prescriptions Per Branded Drug User Per Year<sup>a</sup>

| 2007-2013        | Out-of-pocket costs per user per year (95% CI), 2018 US dollars |                                |                  |
|------------------|-----------------------------------------------------------------|--------------------------------|------------------|
|                  | With Observed Rebates <sup>b</sup>                              | With Zero Rebates <sup>c</sup> | Difference       |
| Overall          | 421 (411 to 431)                                                | 387 (378 to 395)               | 34 (32 to 36)    |
| By coverage type |                                                                 |                                |                  |
| Medicare         | 527 (508 to 546)                                                | 457 (441 to 473)               | 70 (66 to 74)    |
| Commercial       | 335 (327 to 344)                                                | 337 (328 to 345)               | -1 (-1 to -1)    |
| Uninsured        | 672 (609 to 735)                                                | 462 (415 to 510)               | 210 (185 to 234) |
| 2014-2018        | Out-of-pocket costs per user per year (95% CI), 2018 US dollars |                                |                  |
|                  | With Observed Rebates <sup>b</sup>                              | With Zero Rebates <sup>c</sup> | Difference       |
| Overall          | 369 (357 to 380)                                                | 302 (293 to 312)               | 66 (62 to 70)    |
| By coverage type |                                                                 |                                |                  |
| Medicare         | 414 (398 to 431)                                                | 329 (316 to 342)               | 85 (79 to 91)    |
| Commercial       | 314 (299 to 329)                                                | 280 (266 to 294)               | 34 (32 to 37)    |
| Uninsured        | 682 (578 to 786)                                                | 471 (388 to 555)               | 211 (178 to 243) |

<sup>a</sup> Total out-of-pocket costs for single-source branded prescriptions per user per year appear to have decreased for Medicare and commercial insurance patients as the number of branded prescriptions filled per year have also decreased (see eTable 2).

<sup>b</sup> i.e., factual estimates: the model-adjusted estimate of out-of-pocket costs with observed rebates

<sup>c</sup> i.e., counterfactual estimates: the model-adjusted estimate of out-of-pocket costs if rebates were set to zero

CI, confidence interval

**eTable 7.** Estimated Change in Dependent Variable Given \$1 Increase in Independent Variable, 2007-2013 and 2014-2018

| <b>2007-2013</b>                | <b>Independent variable</b> | <b>Additional Covariate<sup>a</sup></b> | <b>Change in dependent variable given \$1 increase in the independent variable (95% CI), 2018 US dollars<sup>a</sup></b> |
|---------------------------------|-----------------------------|-----------------------------------------|--------------------------------------------------------------------------------------------------------------------------|
| <b>Dependent variable</b>       |                             |                                         |                                                                                                                          |
| List price                      | Rebates                     | -                                       | 2.75 (2.55 to 2.96)                                                                                                      |
| Out-of-pocket cost              | List price                  | -                                       | 0.02 (0.01 to 0.03)                                                                                                      |
| Out-of-pocket cost <sup>b</sup> | Rebates                     | -                                       | 0.07 (0.02 to 0.12)                                                                                                      |
| Out-of-pocket cost              | Rebates                     | List price                              | 0.00 (-0.07 to 0.07)                                                                                                     |
| <b>2014-2018</b>                | <b>Independent variable</b> | <b>Additional Covariate<sup>a</sup></b> | <b>Change in dependent variable given \$1 increase in the independent variable (95% CI), 2018 US dollars<sup>a</sup></b> |
| <b>Dependent variable</b>       |                             |                                         |                                                                                                                          |
| List price                      | Rebates                     | -                                       | 2.09 (1.96 to 2.22)                                                                                                      |
| Out-of-pocket cost              | List price                  | -                                       | 0.02 (0.01 to 0.03)                                                                                                      |
| Out-of-pocket cost <sup>b</sup> | Rebates                     | -                                       | 0.04 (0.02 to 0.06)                                                                                                      |
| Out-of-pocket cost              | Rebates                     | List price                              | -0.01 (-0.04 to 0.02)                                                                                                    |

<sup>a</sup> As with main analyses, these analyses included drug and year indicators and interactions for coverage type and pre and post 2014

<sup>b</sup> Identical model specification as primary analysis (i.e., Table 2 results), expressed here as estimated change in out-of-pocket cost given \$1 increase in estimated rebates

CI, confidence interval

**eTable 8.** Sensitivity Analyses of Estimated Out-Of-Pocket Costs With 2009-2013 Preperiod and Alternative Rebate Definitions

| <b>eTable 8a</b><br><b>2009-2013</b>                       | <b>Out-of-pocket costs per prescription (95% CI),<br/>2018 US dollars</b> |                                    |                   |
|------------------------------------------------------------|---------------------------------------------------------------------------|------------------------------------|-------------------|
|                                                            | <b>With Rebates<sup>a</sup></b>                                           | <b>Without Rebates<sup>b</sup></b> | <b>Difference</b> |
| Using 2009-2013 instead of 2007-2013 as the pre-period     | 54 (53 to 54)                                                             | 49 (49 to 50)                      | 4 (4 to 5)        |
| <b>eTable 8b</b><br><b>2007-2013</b>                       | <b>Out-of-pocket costs per prescription (95% CI),<br/>2018 US dollars</b> |                                    |                   |
| <b>Rebate Definitions</b>                                  | <b>With Rebates<sup>a</sup></b>                                           | <b>Without Rebates<sup>b</sup></b> | <b>Difference</b> |
| Rebate = list price minus the greater of net or FSS prices | 52 (51 to 53)                                                             | 49 (49 to 50)                      | 3 (2 to 3)        |
| Rebate = gross price minus net price                       | 52 (51 to 52)                                                             | 50 (49 to 51)                      | 2 (2 to 2)        |
| <b>eTable 8c</b><br><b>2014-2018</b>                       | <b>Out-of-pocket costs per prescription (95% CI),<br/>2018 US dollars</b> |                                    |                   |
| <b>Rebate Definitions</b>                                  | <b>With Rebates<sup>a</sup></b>                                           | <b>Without Rebates<sup>b</sup></b> | <b>Difference</b> |
| Rebate = list price minus the greater of net or FSS prices | 61 (60 to 62)                                                             | 53 (52 to 54)                      | 8 (7 to 8)        |
| Rebate = gross price minus net price                       | 61 (60 to 62)                                                             | 52 (51 to 53)                      | 9 (8 to 9)        |

<sup>a</sup> Factual estimates: the model-adjusted estimate of out-of-pocket costs in the presence of the rebates

<sup>b</sup> Counterfactual estimates: the model-adjusted estimate of out-of-pocket costs in the absence of the rebates

FSS: drug prices from the Federal Supply Schedule reported by the United States Department of Veterans Affairs National Acquisition Center; CI, confidence interval

**eTable 9.** Association of Rebates With Probability of Out-of-Pocket Costs and Increase in Out-of-Pocket Costs<sup>a</sup>

| <b>2007-2013</b> | <b>Probability of incurring out-of-pocket costs, (95% CI)<sup>b</sup></b> | <b>Increase in out-of-pocket costs, given non-zero out-of-pocket costs, % (95% CI)<sup>c</sup></b> |
|------------------|---------------------------------------------------------------------------|----------------------------------------------------------------------------------------------------|
| Overall          | 0.00 (0.00 to 0.01)                                                       | 0.32 (0.30 to 0.34)                                                                                |
| By coverage type |                                                                           |                                                                                                    |
| Medicare         | 0.01 (0.00 to 0.01)                                                       | 0.39 (0.36 to 0.42)                                                                                |
| Commercial       | 0.00 (0.00 to 0.01)                                                       | 0.25 (0.23 to 0.28)                                                                                |
| Uninsured        | -0.01 (-0.03 to 0.01)                                                     | 0.42 (0.31 to 0.53)                                                                                |
| <b>2014-2018</b> | <b>Probability of incurring out-of-pocket costs, (95% CI)<sup>b</sup></b> | <b>Increase in out-of-pocket costs, given non-zero out-of-pocket costs, % (95% CI)<sup>c</sup></b> |
| Overall          | 0.00 (-0.01 to 0.01)                                                      | 0.19 (0.16 to 0.22)                                                                                |
| By coverage type |                                                                           |                                                                                                    |
| Medicare         | 0.00 (-0.01 to 0.02)                                                      | 0.23 (0.19 to 0.26)                                                                                |
| Commercial       | 0.00 (-0.01 to 0.02)                                                      | 0.15 (0.12 to 0.18)                                                                                |
| Uninsured        | 0.01 (-0.04 to 0.05)                                                      | 0.15 (0.00 to 0.31)                                                                                |

<sup>a</sup> Presented as elasticity estimates: percent change in out-of-pocket costs associated with 1% change in estimated rebates

<sup>b</sup> Probability of incurring out-of-pocket costs: i.e., extensive margin

<sup>c</sup> Increase in out-of-pocket costs, given non-zero out-of-pocket costs: i.e., intensive margin  
CI, confidence interval

## eReferences

1. Hernandez I, San-Juan-Rodriguez A, Good CB, Gellad WF. Changes in list prices, net prices, and discounts for branded drugs in the US, 2007-2018. *JAMA* 2020;323:854-62.
